# Supplementary material
Source: bioRxiv or medRxiv preprint supplement (https://www.biorxiv.org/highwire/filestream/42534/field_highwire_adjunct_files/1/143727-2.pdf)

# Local Neurons

A02m (1) - a1L

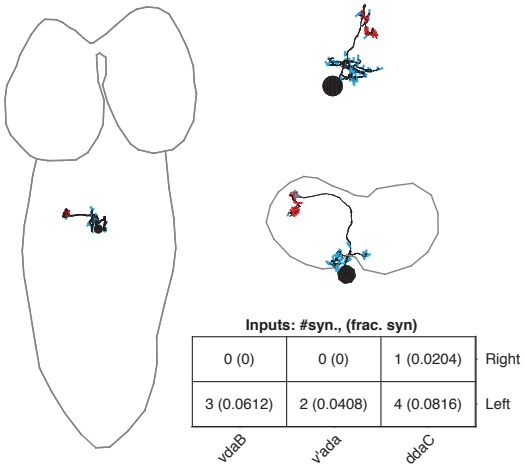

A02m (1) - a1R

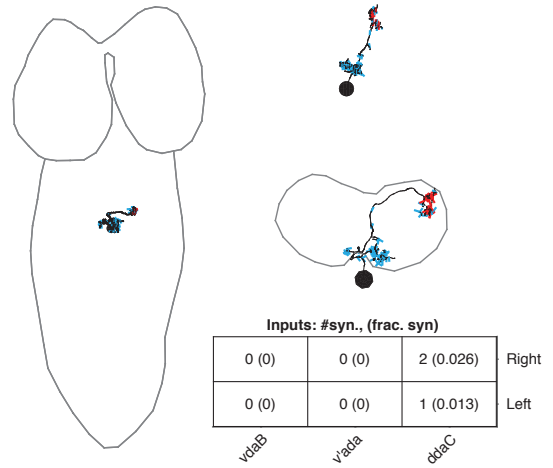

A02m (2) - a1L

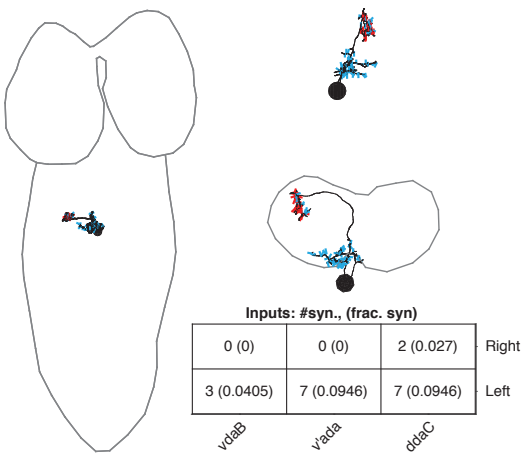

A02m (1) - a1R

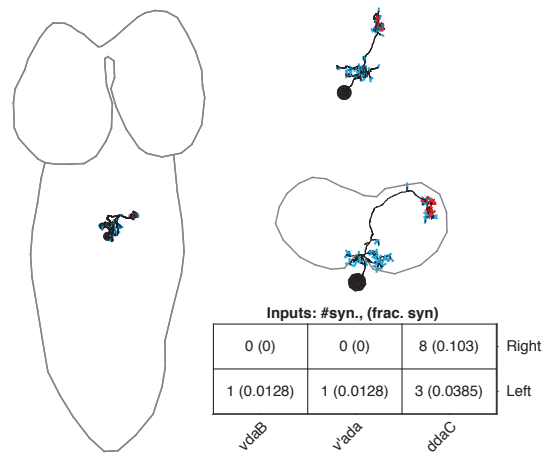

A09a - a1L (Basin-2)

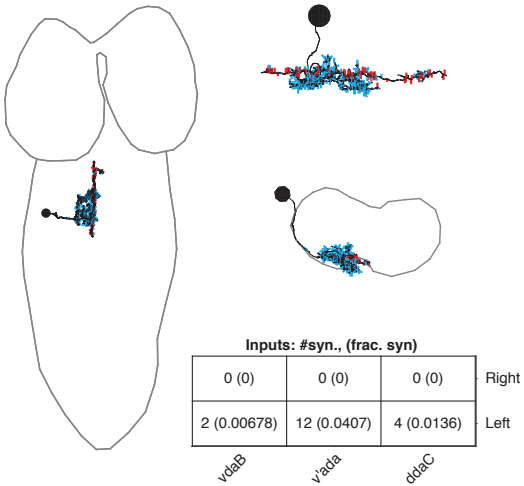

A09a - a1R (Basin-2)

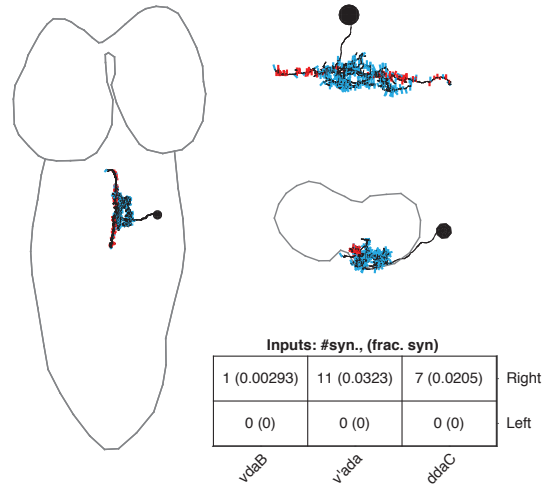

A09c - a1L (Basin-4)

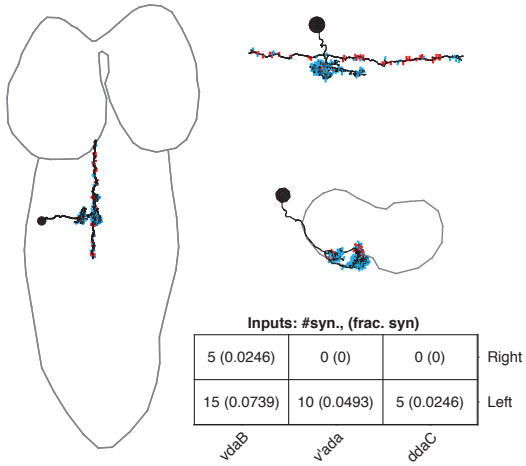

A09c - a1R (Basin-4)

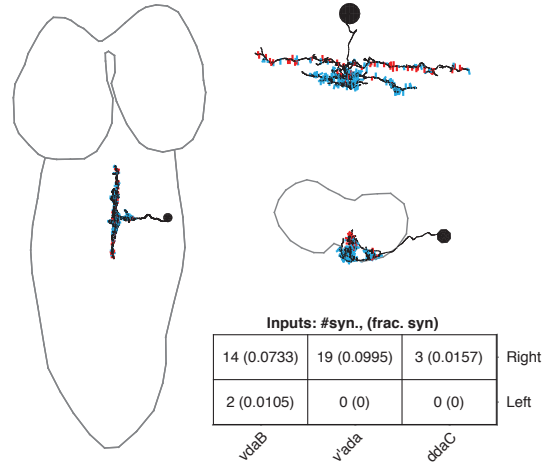

A09l - a1L

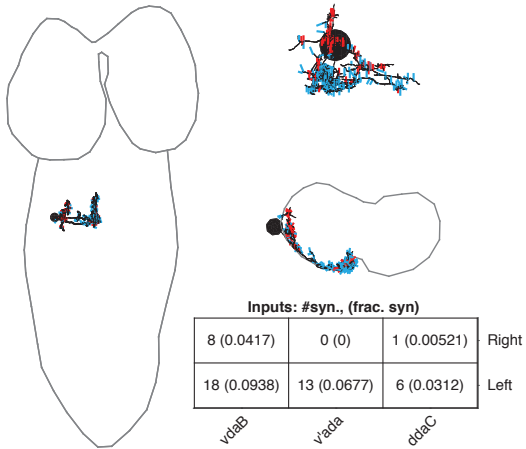

A09l - a1R

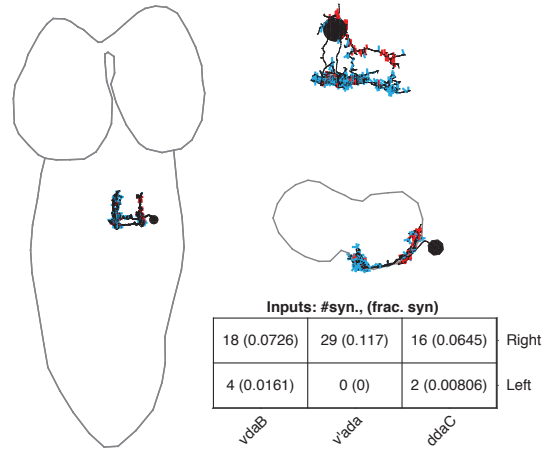

A10a - a1L

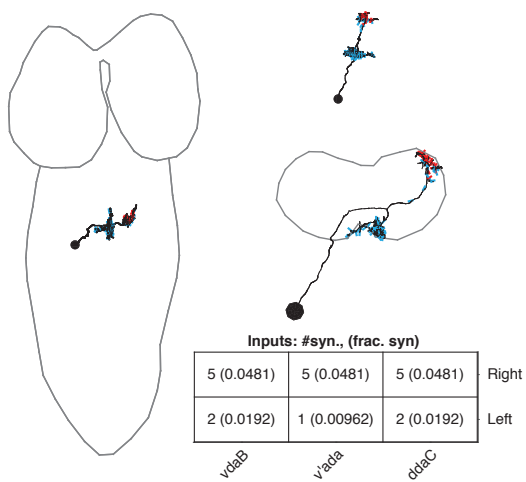

A10a - a1R

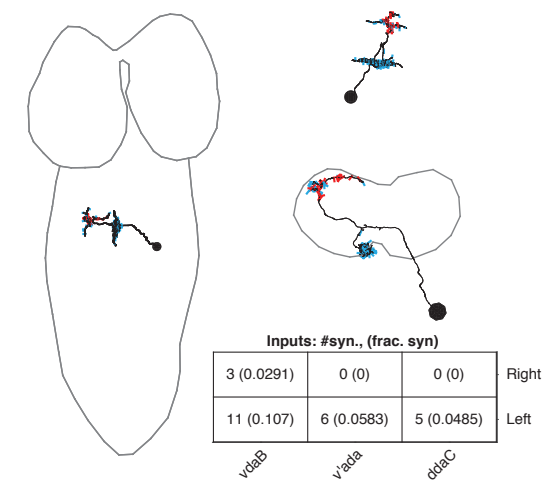

# Regional Neurons

A02o - a2L

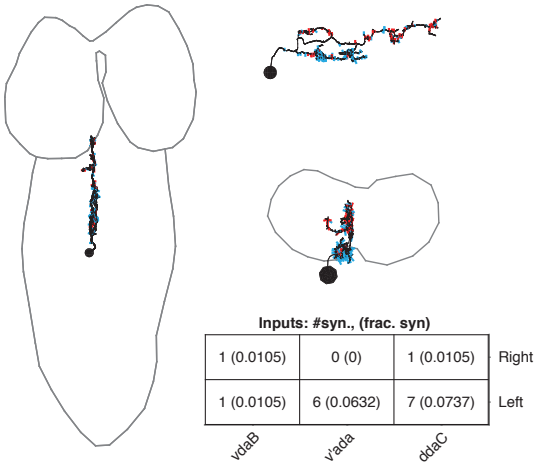

A02o - a2R

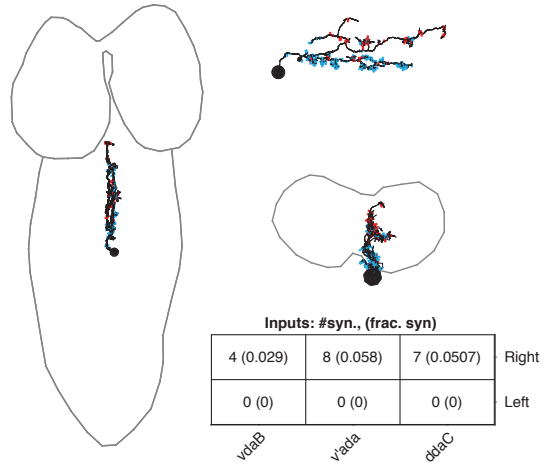

A09e - a3L

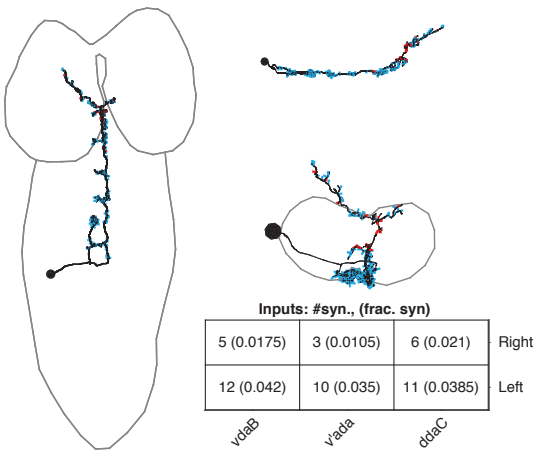

A09e - a3R

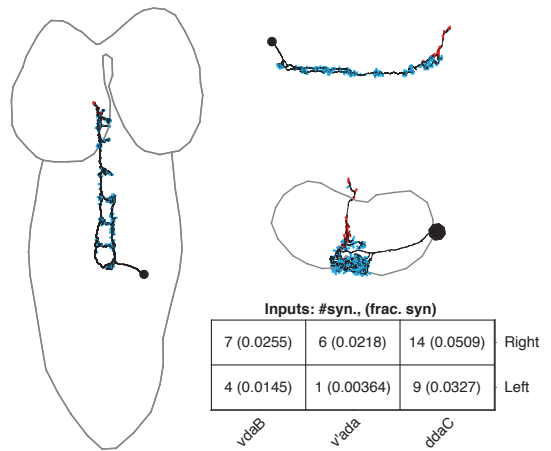

A09o - a3L

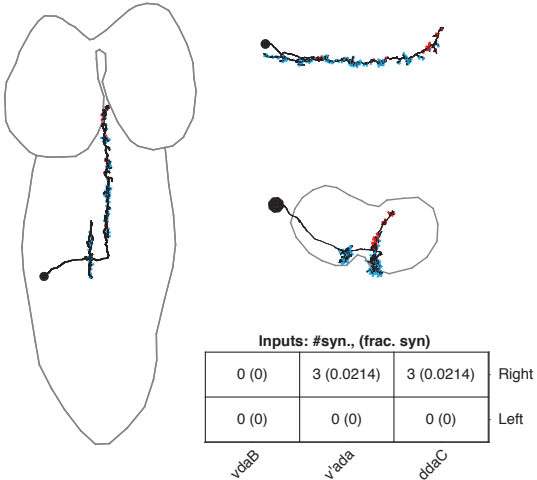

A09o - a3R

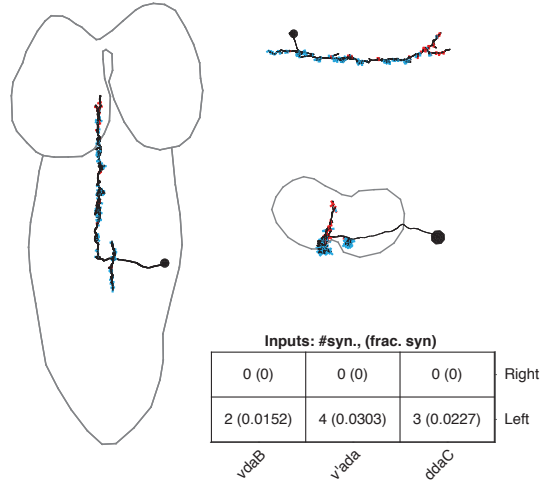

## Descending Neurons

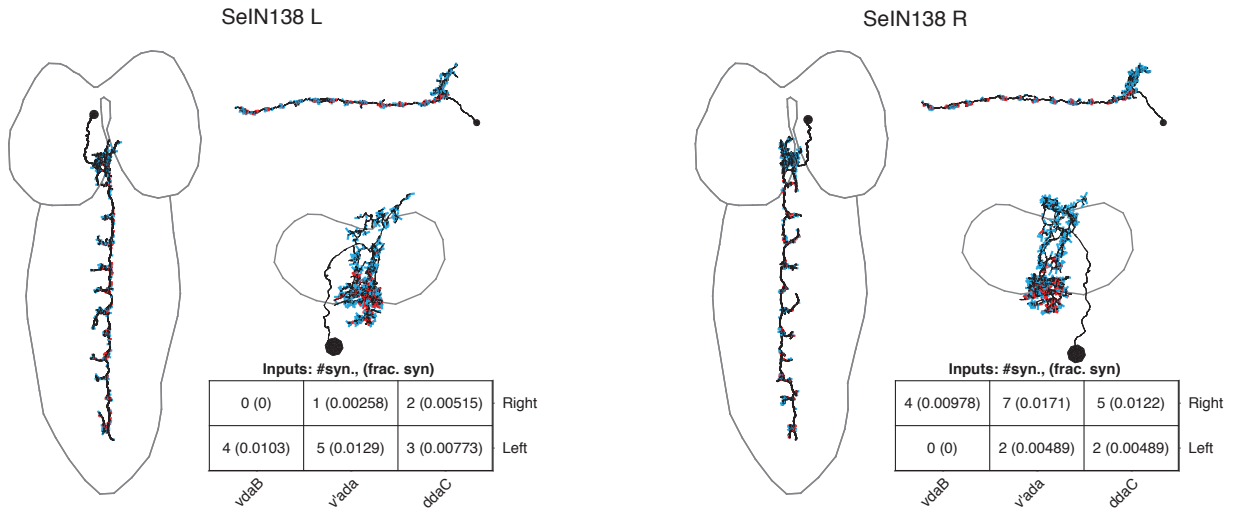

## Ascending Neurons

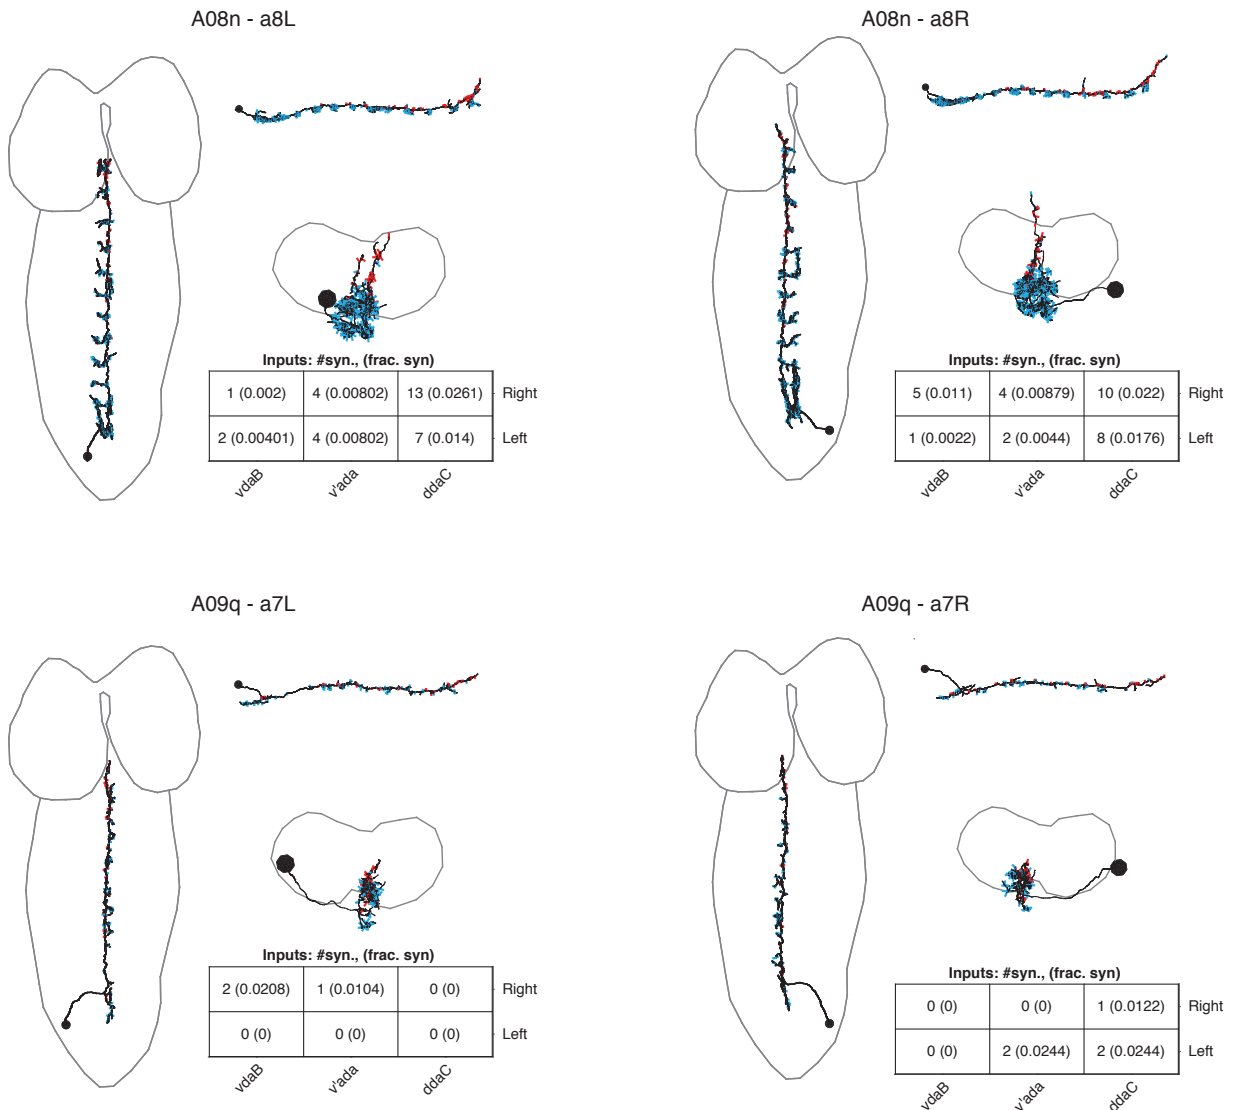



TePn05 L (incomplete)

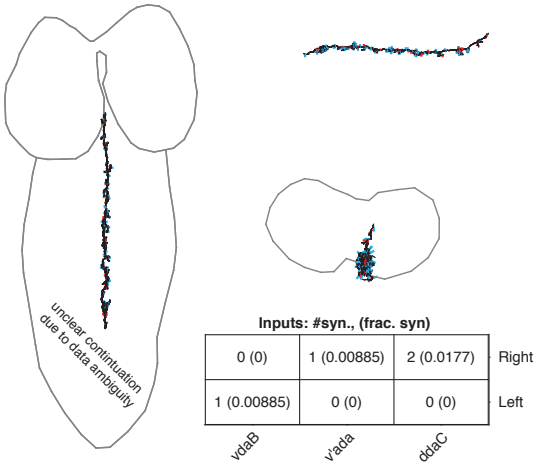

TePn05 R

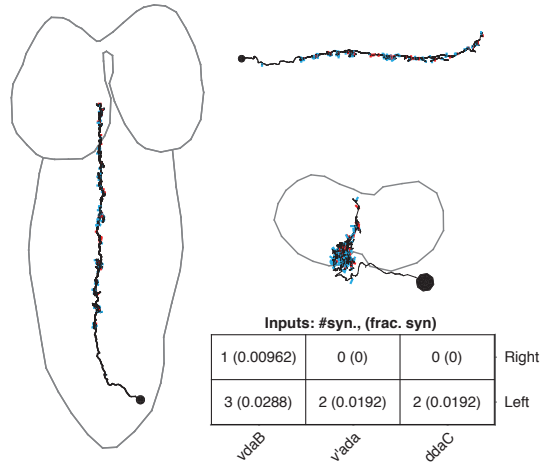

TePn18 L

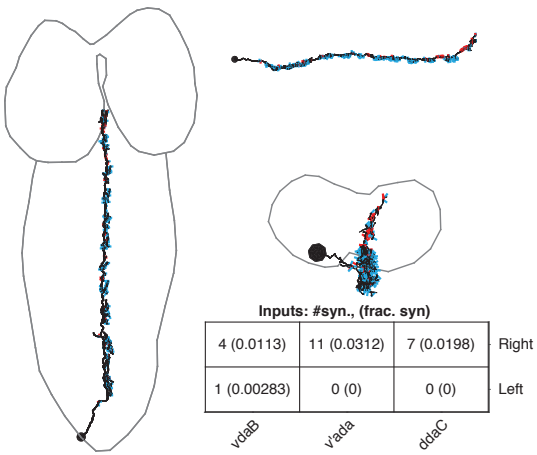

TePn18 R

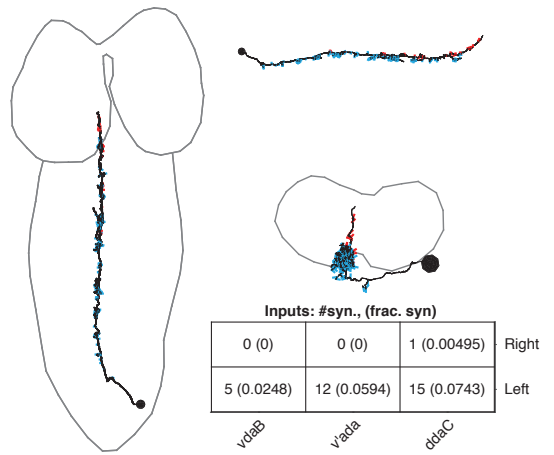

Supplement: Supplementary file [file 143727-2.pdf]
